# Supplementary material for: The effects of genetic drift and genomic selection on differentiation and local adaptation of the introduced populations of Aedes albopictus in southern Russia
Source: PeerJ. 2021 Jul 21;9:e11776. doi: 10.7717/peerj.11776 (PMC8308624; doi:10.7717/peerj.11776)
Supplement: Supplemental Information 1 [file peerj-09-11776-s001.xlsx]

## Sheet: Лист1
	start	end
NW_021837045.1	37200671	37201294
NW_021837045.1	37900348	37901321
NW_021837045.1	48044678	48045682
NW_021837045.1	50256682	50257646
NW_021837045.1	54732035	54732899
NW_021837045.1	55578312	55579323
NW_021837045.1	60279486	60302204
NW_021837045.1	65017011	65018003
NW_021837045.1	75322528	75322837
NW_021837045.1	83783491	83784490
NW_021837045.1	88029328	88030327
NW_021837045.1	88137008	88135805
NW_021837045.1	88622846	88622923
NW_021837045.1	91417436	91418126
NW_021837045.1	102824817	102825567
NW_021837045.1	104231498	104232431
NW_021837045.1	105756074	105756503
NW_021837045.1	109428723	109428868
NW_021837045.1	110267965	110269005
NW_021837045.1	111018403	111025612
NW_021837045.1	115343378	115344358
NW_021837045.1	117802307	117803312
NW_021837045.1	118907454	118908341
NW_021837045.1	122318330	122319281
NW_021837045.1	132231067	132232066
NW_021837045.1	133636338	133637595
NW_021837045.1	134273384	134274096
NW_021837045.1	138808420	138809148
NW_021837045.1	149935024	149936006
NW_021837045.1	157974123	157975101
NW_021837045.1	159676153	159677184
NW_021837045.1	165303057	165304055
NW_021837045.1	170451765	170452764
NW_021837045.1	176427358	176428400
NW_021837045.1	182718987	182720005
NW_021837045.1	184677748	184678071
NW_021837045.1	192512991	192515362
NW_021837045.1	194918049	194921770
NW_021837046.1	23770863	23771853
NW_021837046.1	30310967	30311391
NW_021837046.1	40891134	40892142
NW_021837046.1	47962409	47963411
NW_021837046.1	49789821	49790177
NW_021837046.1	58790101	58791101
NW_021837123.1	772931	773930
NW_021837156.1	7537144	7538111
