# Supplementary material for: The effects of genetic drift and genomic selection on differentiation and local adaptation of the introduced populations of Aedes albopictus in southern Russia
Source: PeerJ. 2021 Jul 21;9:e11776. doi: 10.7717/peerj.11776 (PMC8308624; doi:10.7717/peerj.11776)
Supplement: Supplemental Information 2 [file peerj-09-11776-s002.xlsx]

## Sheet: Лист1
Sochi_1	start_sweep	end_sweep
NW_021837156.1	15164886	15190024
NW_021837156.1	48704939	48711224
NW_021837223.1	235907	249906
NW_021837223.1	1544807	1565980
Sochi_2
NW_021837212.1	522302	524266
NW_021837534.1	842828	846736
NW_021837678.1	751797	763589
NW_021837678.1	870946	888496
Sochi_3
NW_021837374.1	4823	14078
NW_021837374.1	32311	46369
Krasnodar_4
NW_021838456.1	219819	230435
NW_021838456.1	587525	593798
NW_021838604.1	482974	493275
Krasnodar_5
NW_021837128.1	57728	66886
NW_021837556.1	247500	258061
NW_021837556.1	748026	752637
NW_021837556.1	1104270	1105906
NW_021837303.1	3215	6582
NW_021837303.1	21870	23617
NW_021837811.1	290807	291322
NW_021837987.1	1120921	1137370
Krasnodar_6
NW_021837467.1	76159	82053
